# Supplementary material for: Herbal formula LLKL ameliorates hyperglycaemia, modulates the gut microbiota and regulates the gut‐liver axis in Zucker diabetic fatty rats
Source: PubMed Central journal article supplement (PMC7810939; doi:10.1111/jcmm.16084), 2020-11-20

**A**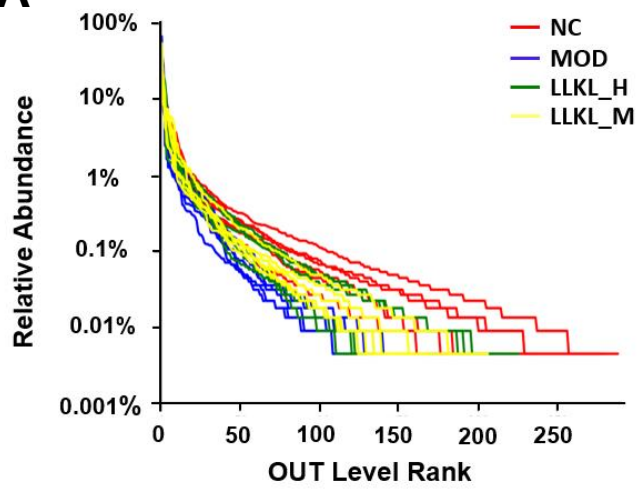**B**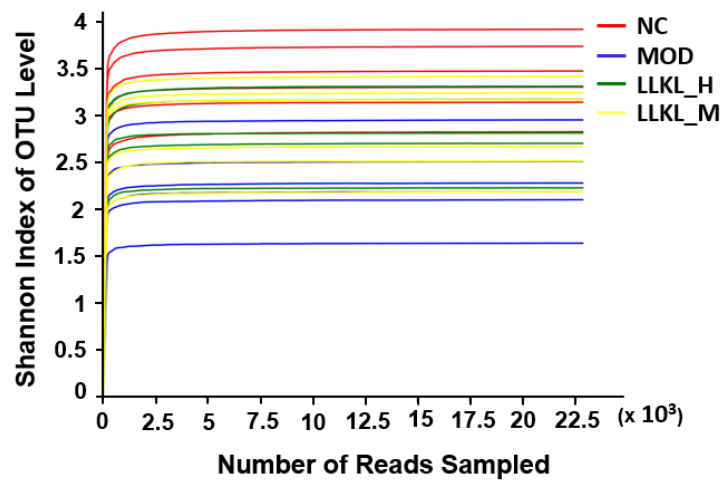

Supplement: JCMM-25-367-s002.pdf [file JCMM-25-367-s002.pdf]
